# Supplementary material for: Weight-shifting-based robot control system improves the weight-bearing rate and balance ability of the static standing position in hip osteoarthritis patients: a randomized controlled trial focusing on outcomes after total hip arthroplasty
Source: PeerJ. 2023 May 17;11:e15397. doi: 10.7717/peerj.15397 (PMC10199675; doi:10.7717/peerj.15397)
Supplement: Supplemental Information 4 [file peerj-11-15397-s004.xlsx]

## Sheet: Before THA
1: Locobot group	Ground reaction forces: Vertical forces			Total trajectory length	Outer diameter area	OLS test (operated side) (s)			OLS test (non-operated side) (s)			3m-TUG test (s)			BBS	FR test (cm）
2: Control group	Mean WBA (operated side) (N/kg)	Mean WBA (non-operated side) (N/kg)	Mean WBR			1st	2nd	Best	1st	2nd	Best	1st	2nd	Best		1st	2nd	Best
2	4.41177	5.36177	0.822821	50.5057	42.5541	60	60	60	60	60	60	7.33	5.81	5.81	56	35	35	35
1	5.63614	4.1408	1.36112	60.7898	22.7919	11.75	27.65	27.65	5.34	55.78	55.78	7.37	7.35	7.35	56	30	34	34
2	4.60473	5.259	0.87559	61.9384	19.3815	20.54	15.2	20.54	26.06	47.88	47.88	9.11	8.57	8.57	56	25	34	34
1	4.03081	5.83015	0.691373	39.2078	17.0609	23.5	60	60	60	60	60	8.62	8.16	8.16	56	36	30	36
1	4.48501	5.28362	0.848853	59.4065	41.111	53.99	60	60	31.52	29.14	31.52	9.16	8.66	8.66	56	27	32	32
2	3.9715	5.65962	0.701726	70.4848	40.1897	12.87	32.05	32.05	15.31	10.95	15.31	9.85	8.97	8.97	56	25	28	28
1	4.41937	5.43036	0.813827	114.699	91.2107	8.16	16.01	16.01	2.36	8.34	8.34	8.74	8.79	8.74	56	37	32	37
2	3.93208	5.78948	0.679176	49.9948	17.0803	37.69	24.56	37.69	16.87	60	60	7.22	7.45	7.22	56	28	29	29
1	4.61859	5.13249	0.899873	37.1508	7.55889	16.42	27.67	27.67	31.13	26.36	31.13	11.11	11.12	11.11	56	32	38	38
2	4.7796	6.11482	0.781642	54.3163	16.0699	4.45	15.25	15.25	8.75	22.42	22.42	9.13	8.67	8.67	55	25	27	27
1	4.20757	5.43878	0.773624	93.1258	97.9237	43	21.95	43	60	60	60	8.04	7.73	7.73	56	30	32	32
2	4.17953	5.68816	0.734777	59.6995	10.5077	5.67	8.65	8.65	5.62	9.41	9.41	7.48	7.68	7.48	53	38	42	42
1	5.0418	4.88423	1.03226	80.6793	27.9754	47.84	50.72	50.72	53.27	56.7	56.7	8.04	7.81	7.81	56	32	32	32
2	3.35528	6.33012	0.53005	65.7412	37.116	17.42	20.1	20.1	60	60	60	9.46	9.35	9.35	56	25	26	26
1	4.075	5.54892	0.734377	68.0251	59.4237	4.36	5	5	34.08	47.73	47.73	7.22	7.19	7.19	55	25	26	26
2	4.9866	4.77505	1.0443	53.4427	29.707	16.42	60	60	60	60	60	9.02	9.13	9.02	56	25	26	26
1	4.07659	5.80473	0.702288	67.9483	54.0261	30.12	41.58	41.58	16.46	38.83	38.83	8.73	8.27	8.27	56	36	37	37
1	3.95909	5.81864	0.680415	77.6598	90.1486	14.18	14.27	14.27	19.53	21.41	21.41	14.43	13.39	13.39	53	25	25	25
2	3.91979	5.85673	0.669279	55.9763	70.3411	16.17	17.41	17.41	47.46	60	60	10.54	9.88	9.88	54	18	18	18
2	4.61626	5.23649	0.881555	48.5389	12.5096	23.61	14.42	23.61	21.87	24.73	24.73	8.05	7.41	7.41	55	22	22	22
Notes. WBA, weight-bearing amount; WBR, weight-bearing ratio; OLS, one-leg standing; TUG, timed up & go; BBS, berg balance scale; FR, functional reach.

## Sheet: Twelve days after THA
1: Locobot group	Ground reaction forces: Vertical forces			Total trajectory length	Outer diameter area	OLS test (operated side) (s)			OLS test (non-operated side) (s)			3m-TUG test (s)			BBS	FR test (cm）
2: Control group	Mean WBA (operated side) (N/kg)	Mean WBA (non-operated side) (N/kg)	Mean WBR			1st	2nd	Best	1st	2nd	Best	1st	2nd	Best		1st	2nd	Best
2	4.51437	5.28545	0.854113	87.1402	47.2031	60	60	60	60	60	60	9.57	9.12	9.12	56	29	29	29
1	5.61371	4.24703	1.32179	87.5186	31.9105	60	60	60	60	60	60	10.77	10.31	10.31	56	32	34.5	34.5
2	4.35186	5.49978	0.79128	63.6978	18.6904	12.04	17.34	17.34	7.21	15.85	15.85	11.2	10.34	10.34	56	27.5	29	29
1	4.59801	5.17586	0.888358	51.1729	32.0301	29.45	60	60	60	60	60	14.06	12.65	12.65	56	27	25	27
1	4.81034	4.84724	0.992387	66.2513	27.7652	60	60	60	60	60	60	7.33	6.63	6.63	56	34	36	36
2	4.09525	5.72862	0.714875	134.757	131.526	60	60	60	7.5	9.36	9.36	9.05	8.47	8.47	54	28	30	30
1	5.03619	4.77498	1.0547	71.4276	21.1032	14.02	19.75	19.75	50.92	33.51	50.92	13.78	11.35	11.35	55	34	31	34
2	3.6898	6.19523	0.595587	44.3852	9.14298	14.51	19.48	19.48	60	60	60	8.61	7.76	7.76	55	36	38	38
1	4.61422	5.29361	0.871658	50.0829	23.8918	18.11	20.15	20.15	30.83	43.96	43.96	10.4	10.45	10.4	55	26	22	26
2	3.89338	5.95569	0.653724	92.7967	69.8589	19.93	13.43	19.93	16.11	32.09	32.09	8.66	8.23	8.23	55	23	29	29
1	5.03573	4.83834	1.0408	66.9535	27.3686	50.19	40.69	50.19	44.21	60	60	6.9	6.56	6.56	56	49	51	51
2	5.24524	4.56109	1.15	63.9049	26.1876	10.88	16.06	16.06	10.19	11.54	11.54	10.73	10.89	10.73	55	35	39	39
1	5.1666	4.54106	1.13775	55.4542	21.3389	60	60	60	60	60	60	9.14	8.97	8.97	56	33	34	34
2	3.52968	6.17997	0.571149	92.2157	143.928	7.21	12.86	12.86	36.05	38.51	38.51	13.93	13.62	13.62	49	24	27	27
1	5.15531	4.56869	1.1284	45.2958	14.4233	48.07	24.05	48.07	17.71	25.47	25.47	8.32	7.56	7.56	56	37	37	37
2	5.50376	4.19886	1.31078	73.1807	44.8861	12.34	27.88	27.88	60	60	60	8.47	7.85	7.85	56	25	26	26
1	5.10702	4.65269	1.09765	58.0237	16.658	21.9	40.85	40.85	34.95	60	60	7.82	8.08	7.82	56	27	28	28
1	5.26009	4.56505	1.15225	72.0425	35.7183	52.25	27.62	52.25	23.34	29.4	29.4	14.56	13.47	13.47	56	26	28	28
2	4.25233	5.40497	0.786744	59.1343	81.557	5.69	5.64	5.69	33.69	35.86	35.86	10.53	9.69	9.69	54	25	26	26
2	5.05929	4.74055	1.06724	96.6596	48.8549	36.39	58.77	58.77	60	60	60	6.56	6.95	6.56	56	25	25	25
Notes. WBA, weight-bearing amount; WBR, weight-bearing ratio; OLS, one-leg standing; TUG, timed up & go; BBS, berg balance scale; FR, functional reach.

## Sheet: Three months after THA
1: Locobot group	Ground reaction forces: Vertical forces			Total trajectory length	Outer diameter area	OLS test (operated side) (s)			OLS test (non-operated side) (s)			3m-TUG test (s)			BBS	FR test (cm）
2: Control group	Mean WBA (operated side) (N/kg)	Mean WBA (non-operated side) (N/kg)	Mean WBR			1st	2nd	Best	1st	2nd	Best	1st	2nd	Best		1st	2nd	Best
2	5.98556	3.93443	1.52133	58.089	29.0669	60	60	60	60	60	60	5.34	5.18	5.18	56	38	34	38
1	5.93038	3.99129	1.48583	45.9176	30.7506	28.5	48.73	48.73	46.78	31.78	46.78	7.06	6.04	6.04	56	39	39	39
2	4.20448	5.73263	0.733429	72.4319	13.1808	13.43	5.06	13.43	20.51	23.3	23.3	8.63	8.56	8.56	56	27	30	30
1	5.02241	4.87937	1.02932	41.885	15.9666	60	60	60	60	60	60	7.9	8.31	7.9	56	31	32	32
1	5.05416	4.72001	1.07079	54.8979	33.7314	60	60	60	60	60	60	7.5	6.98	6.98	56	33	30	33
2	4.53177	5.23256	0.866071	60.9232	49.9643	60	60	60	11.62	9.75	11.62	7.63	6.72	6.72	56	29	33	33
1	5.04086	4.808	1.04843	78.4915	23.3805	60	60	60	31.82	24.67	31.82	6.89	6.62	6.62	56	39	40	40
2	4.75794	4.95071	0.961061	54.635	50.8171	33.54	17.32	33.54	60	60	60	6.59	6.97	6.59	56	33	34	34
1	4.99092	4.72481	1.05632	36.5417	8.16078	21.27	41.5	41.5	22.9	60	60	10.74	10.63	10.63	55	25	26	26
2	5.00578	5.11873	0.977935	106.008	51.8188	23.86	40.7	40.7	41.91	10.97	41.91	8.83	7.77	7.77	56	25	25	25
1	5.00603	4.42228	1.132	43.8757	24.5441	60	60	60	60	60	60	7.29	6.88	6.88	56	34	35	35
2	5.12028	4.69304	1.09104	61.7479	40.1628	21.98	34.16	34.16	18.51	26.25	26.25	7.38	7.73	7.38	56	28	28	28
1	5.73862	4.03114	1.42357	41.114	25.907	46.39	60	60	60	60	60	7.57	6.94	6.94	56	27	29	29
2	3.88201	5.73371	0.677051	43.2442	11.0783	5.58	27.48	27.48	60	60	60	9.68	10.14	9.68	56	25	26	26
1	4.95913	5.03787	0.984371	56.7368	14.1368	60	60	60	60	60	60	6.45	6.08	6.08	56	31	31	31
2	5.27496	4.48514	1.1761	61.0844	29.3622	36.41	60	60	32.14	60	60	6.62	6.75	6.62	56	30	32	32
1	5.13188	4.62367	1.10991	71.5622	50.7211	21.11	55.34	55.34	60	60	60	7.18	6.79	6.79	56	27	29	29
1	4.69597	4.91003	0.956403	63.5957	30.9559	28.44	41.08	41.08	43.36	35.27	43.36	11.21	10.62	10.62	56	30	30	30
2	4.44134	5.36836	0.827318	45.1616	14.3031	13.38	54.45	54.45	24.45	60	60	8.43	8.09	8.09	56	35	35	35
2	4.79571	4.54854	1.05434	57.587	13.9132	43.78	60	60	60	60	60	5.72	5.88	5.72	55	22	24	24
Notes. WBA, weight-bearing amount; WBR, weight-bearing ratio; OLS, one-leg standing; TUG, timed up & go; BBS, berg balance scale; FR, functional reach.
